# Supplementary material for: KRAS promoter oligonucleotide with decoy activity dimerizes into a unique topology consisting of two G-quadruplex units
Source: PubMed Central journal article supplement — Nucleic Acids Res. 2015 Dec 9;44(2):917–25. doi: 10.1093/nar/gkv1359 (PMC4737153; doi:10.1093/nar/gkv1359), 2015-12-09
Supplement: supp_gkv1359_nar-02391-f-2015-File008.pdf [file supp_gkv1359_nar-02391-f-2015-File008.pdf]

## SUPPLEMENTARY MATERIAL

### ***KRAS* promoter oligonucleotide with decoy activity dimerizes into a unique topology consisting of two G-quadruplex units**

Peter Podbevšek<sup>1,2</sup> and Janez Plavec<sup>1,2,3,\*</sup>

<sup>1</sup> Slovenian NMR Center, National Institute of Chemistry, Hajdrihova 19, SI-1000 Ljubljana, Slovenia

<sup>2</sup> EN-FIST Centre of Excellence, Trg Osvobodilne fronte 13, SI-1000 Ljubljana, Slovenia

<sup>3</sup> Faculty of Chemistry and Chemical Technology, University of Ljubljana, Večna pot 113, SI-1000 Ljubljana, Slovenia

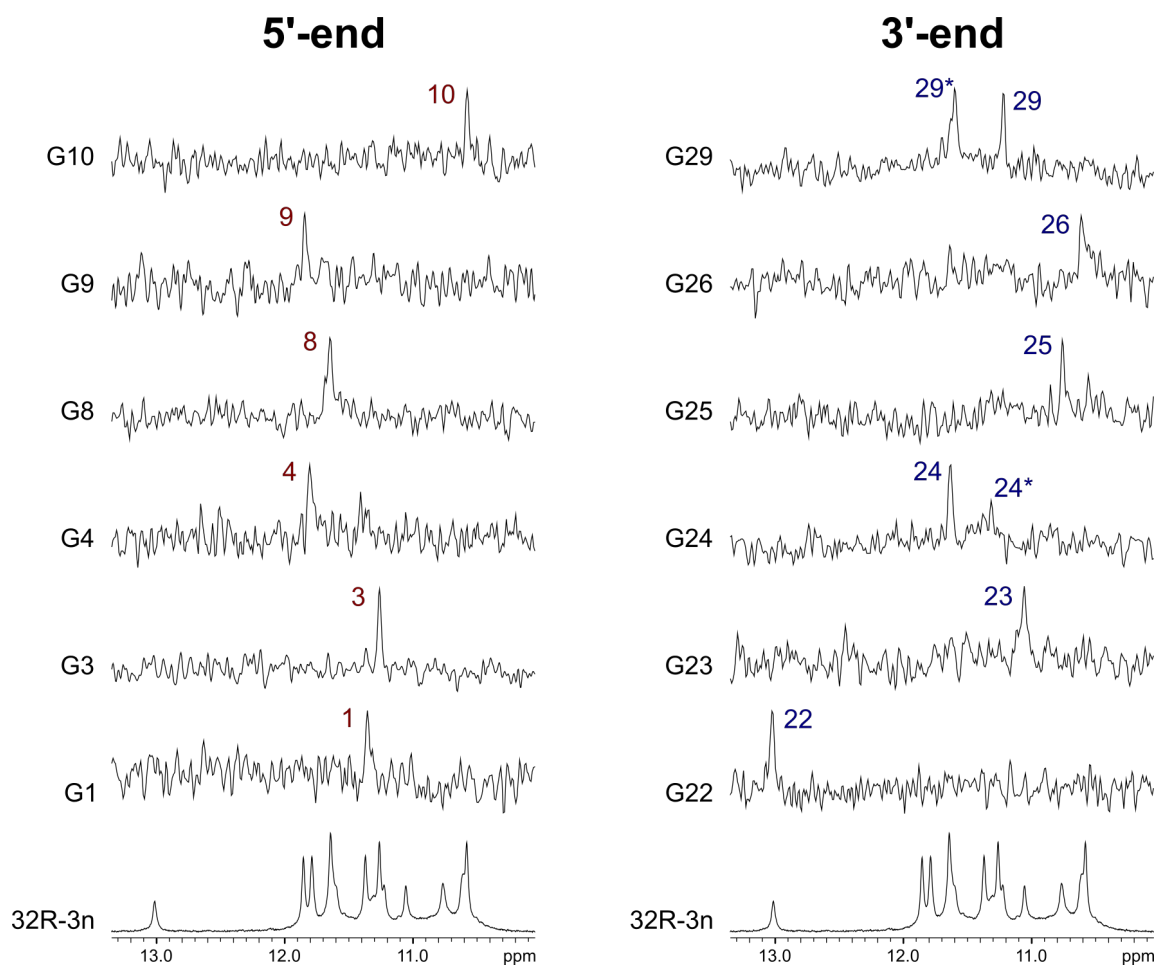

Figure S1. Imino regions of 1D  $^1\text{H}$  NMR spectra of the parent 32R-3n and 1D  $^{15}\text{N}$ -edited HSQC spectra of  $^{15}\text{N}$  site specific labeled guanines of the 5'- and 3'-end G-quadruplex forming regions.

## 5q

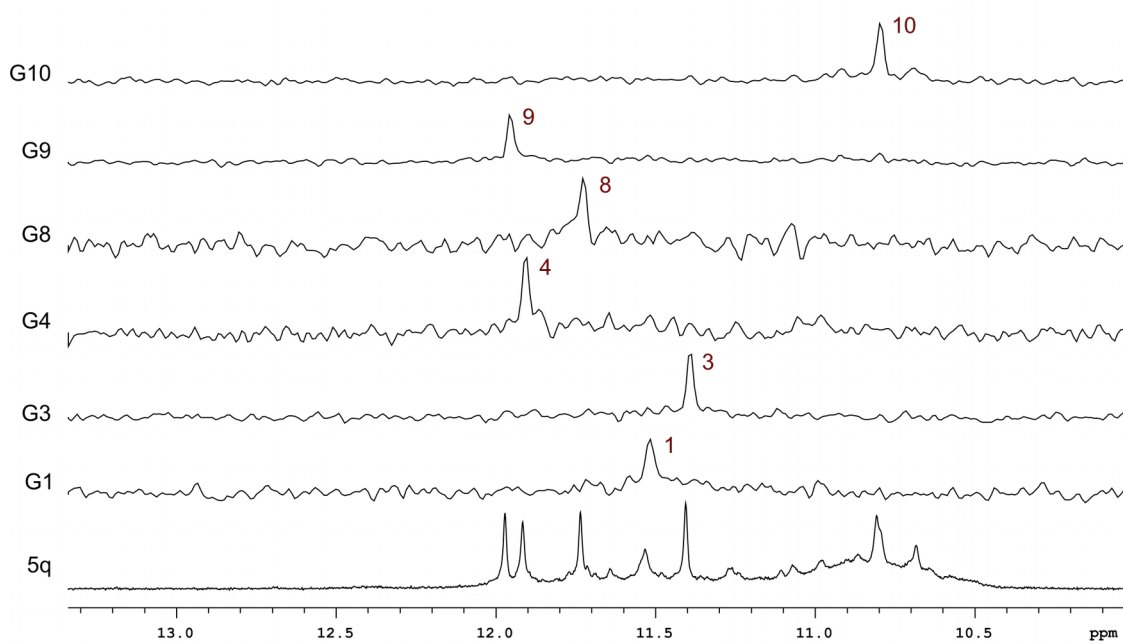

## 3q

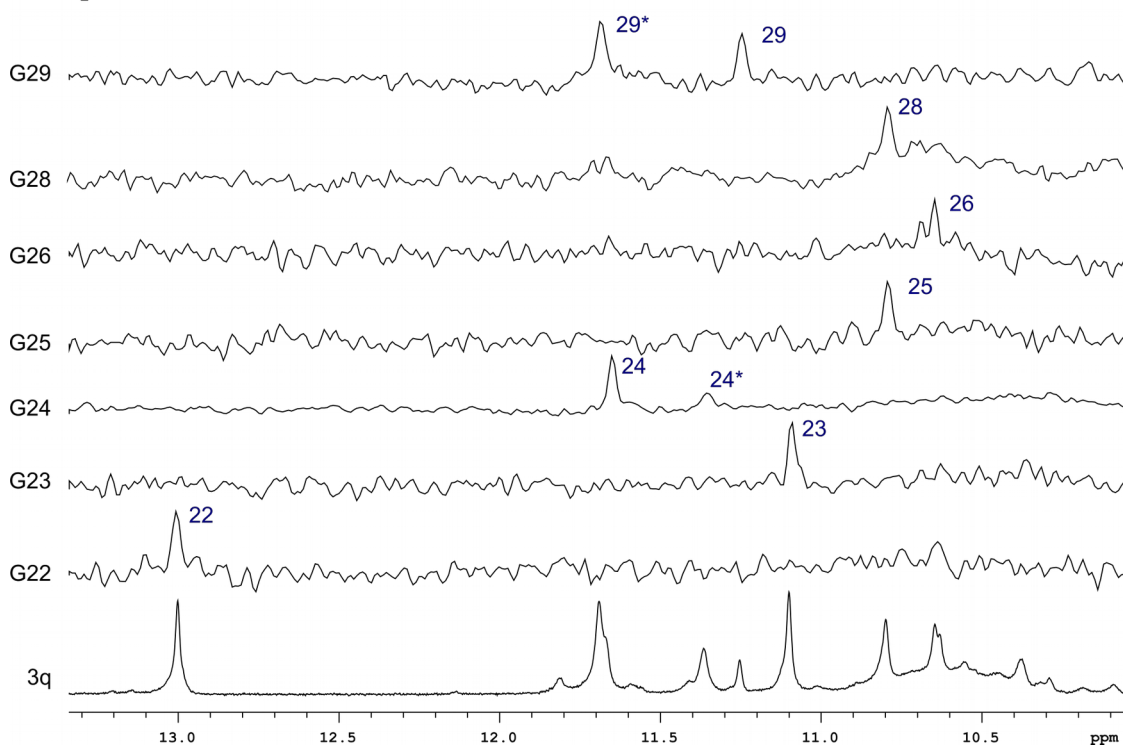

Figure S2. Imino regions of 1D  $^1\text{H}$  NMR spectra of 5q and 3q and 1D  $^{15}\text{N}$ -edited HSQC spectra of  $^{15}\text{N}$  site specific labeled guanines of the 5'- and 3'-end G-quadruplex forming regions.

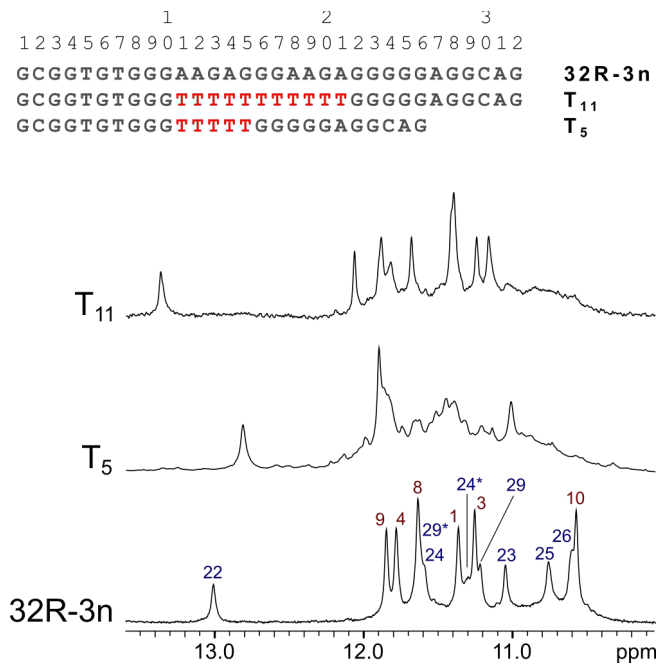

Figure S3. Imino regions of 1D <sup>1</sup>H NMR spectra of oligonucleotides with T<sub>11</sub> and T<sub>5</sub> elements in comparison to the parent 32R-3n.

## 5'-end

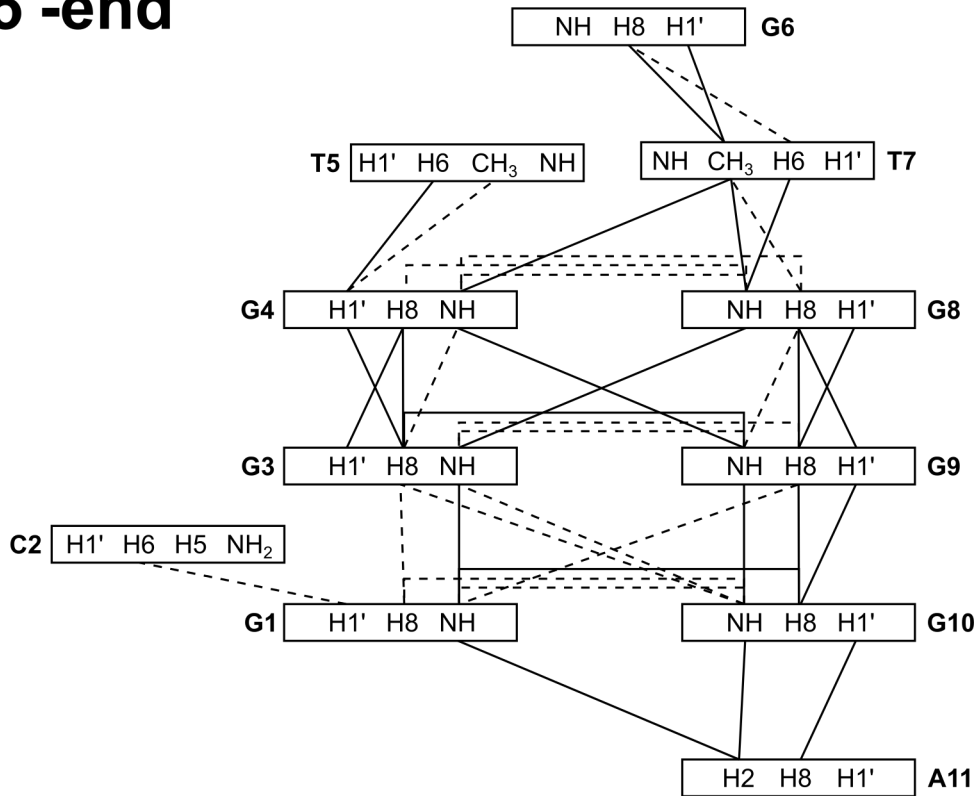

## 3'-end

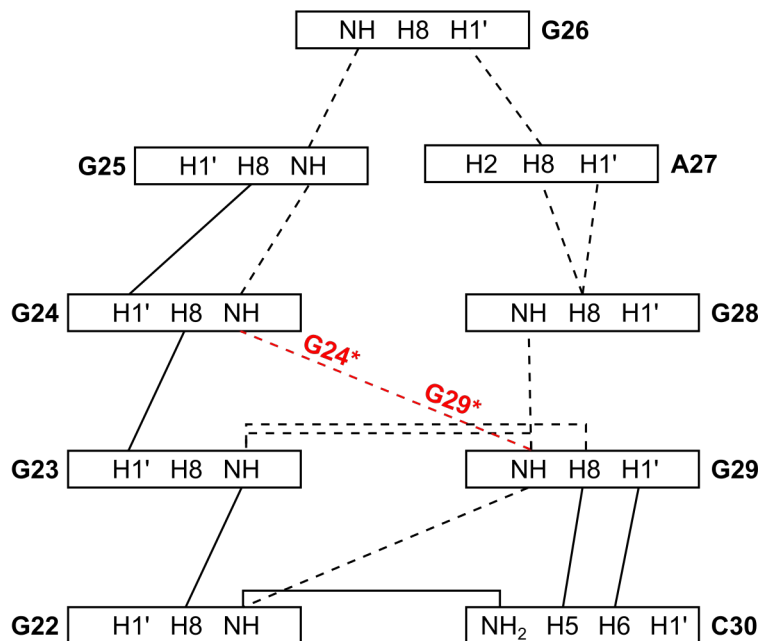

Figure S4. A diagram of strong (solid line) and weak (dashed line) NOE connectivities for the two G-quadruplex units. Due to the symmetric nature of both structures the connectivities in the diagram do not distinguish between inter- and intra-strand contacts.

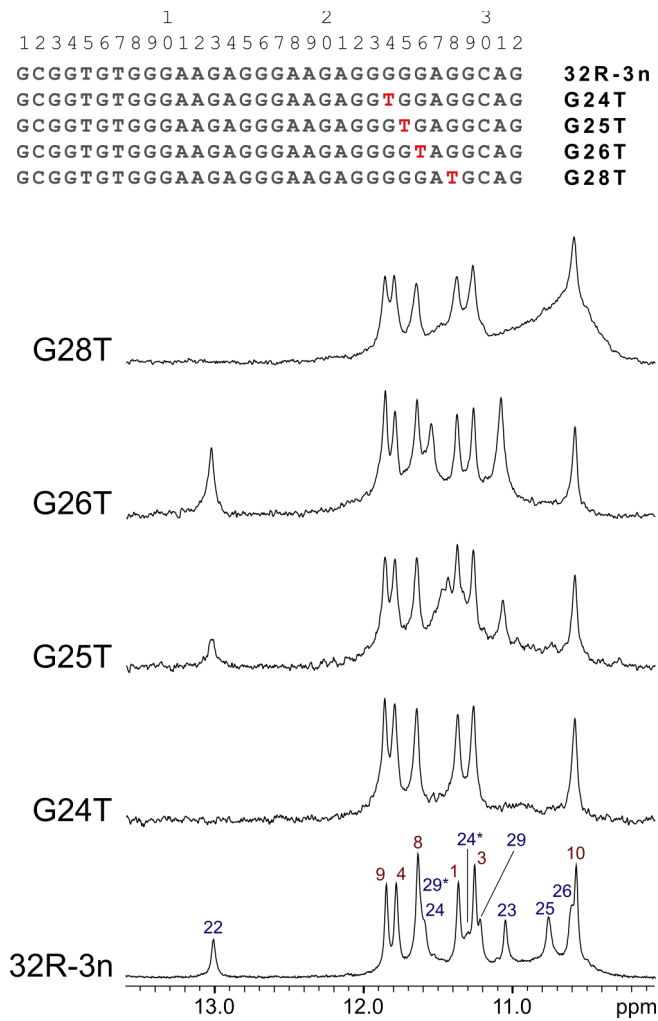

Figure S5. Imino regions of 1D <sup>1</sup>H NMR spectra of oligonucleotides with G24T, G25T, G26T and G28T substitutions in comparison to the parent 32R-3n.

### 3q (<sup>1</sup>H)

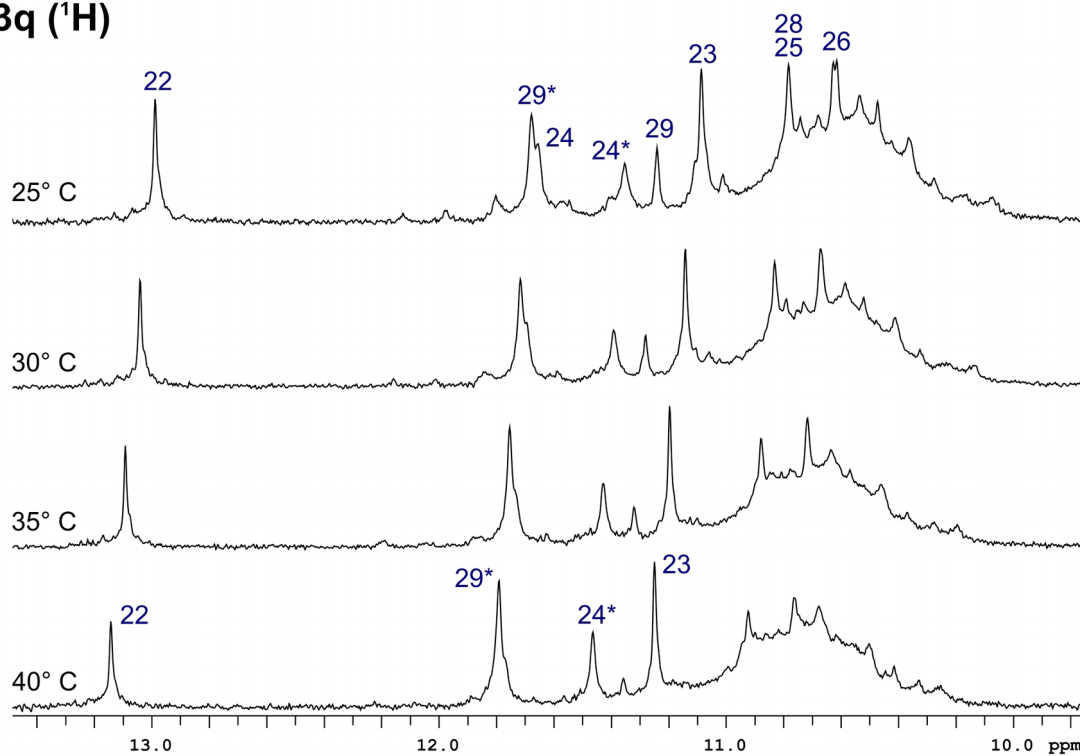

### 3q (<sup>15</sup>N-edited HSQC)

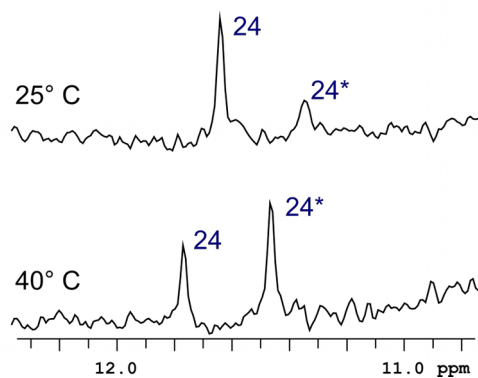

Figure S6. Imino regions of 1D <sup>1</sup>H NMR spectra of 3q and <sup>15</sup>N-edited HSQC of G24 site specific <sup>15</sup>N labeled 3q at different temperatures.

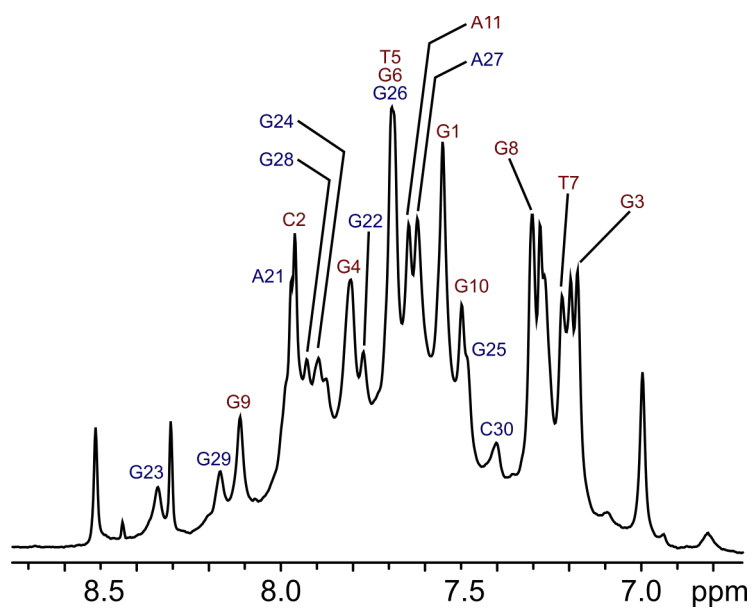

Figure S7. Aromatic region of 1D <sup>1</sup>H NMR spectrum of 32R-3n with assignments.



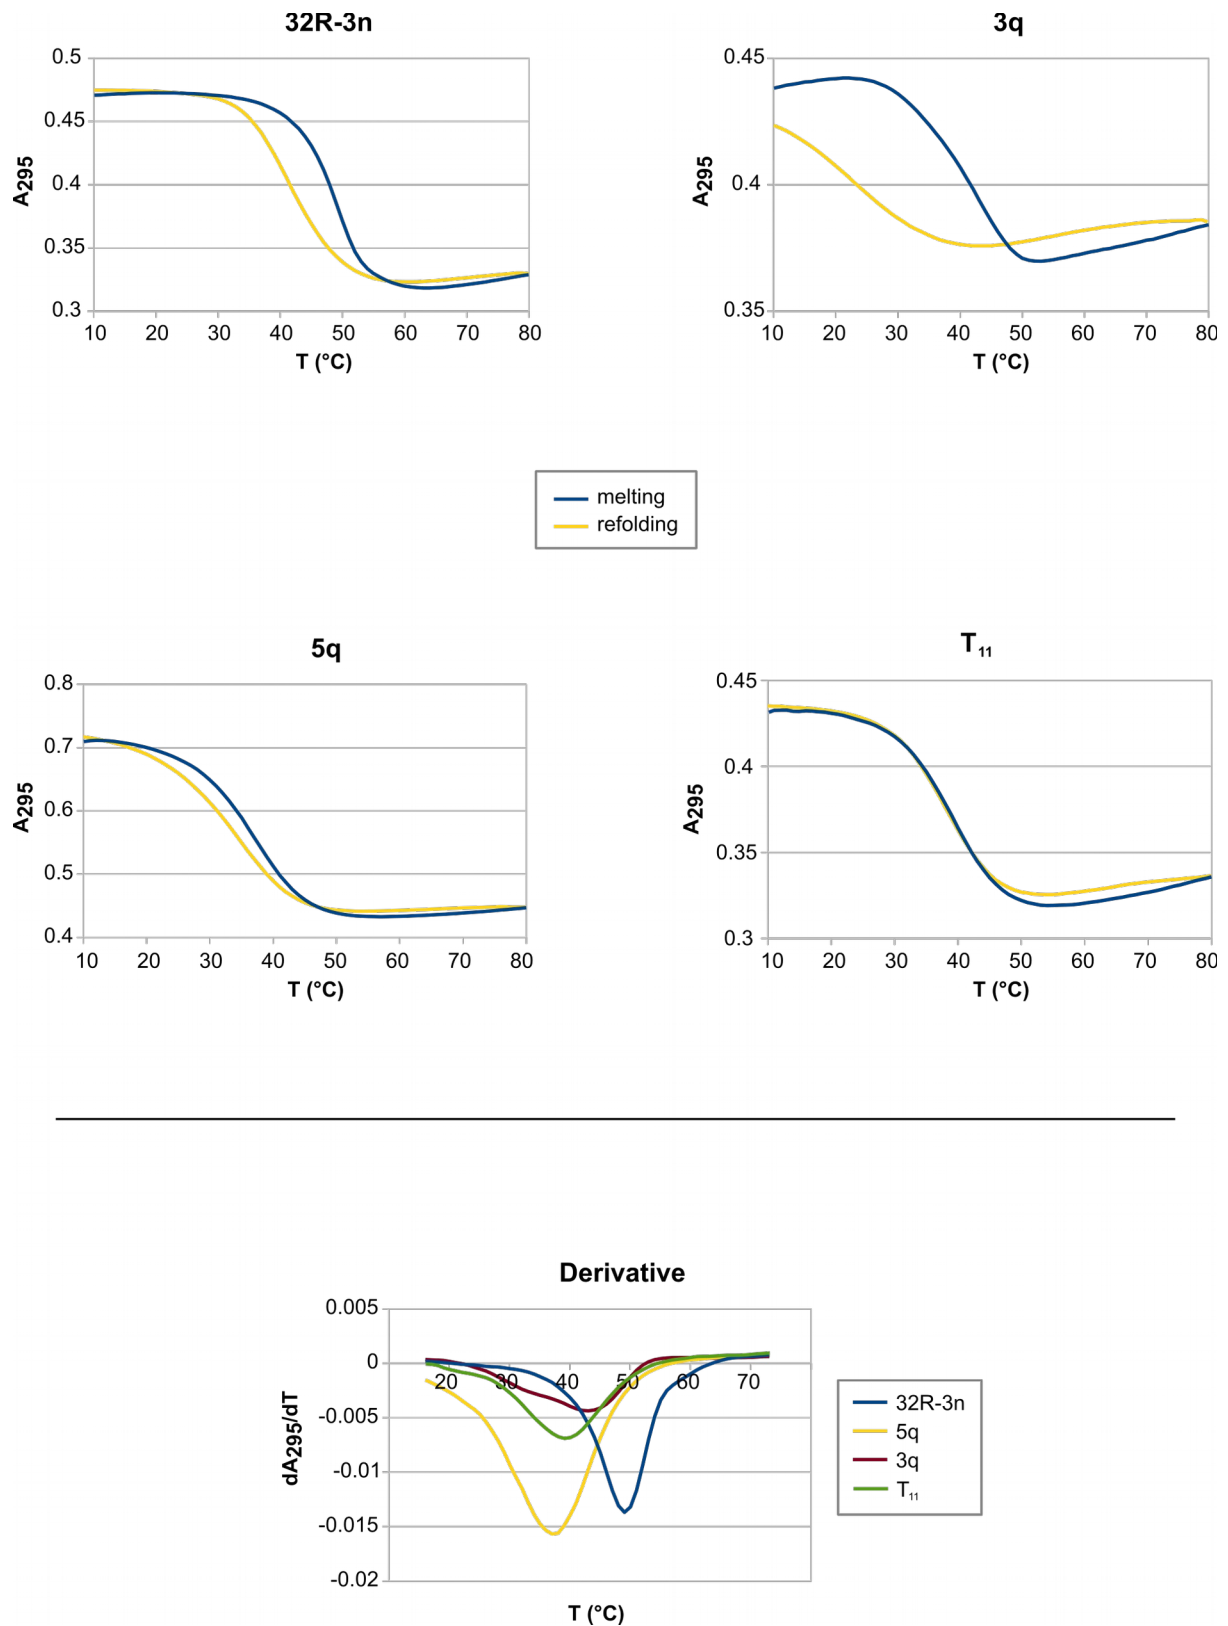

Figure S8. UV melting and refolding curves for 32R-3n, 5q, 3q and T<sub>11</sub>, and a graph with the first derivative of the melting curves.
